# Supplementary material for: Tau filaments with the chronic traumatic encephalopathy fold in a case of vacuolar tauopathy with VCP mutation D395G
Source: PubMed Central journal article supplement (PMC7616110; doi:10.1007/s00401-024-02741-x), 2024-05-17
Supplement: EMS196676-supplement-Supplementary_Materials.pdf [file EMS196676-supplement-Supplementary_Materials.pdf]

544 **SUPPLEMENTARY FIGURE LEGEND**

545 **Figure S1**

546 **Fourier shell correlation (FSC) curves.**

547 FSC curves of cryo-EM maps (left panel) and model to map validation  
548 (right panel). a, CTE Type I tau filament from VT; CTE Type II tau  
549 filament from VT; CTE Type III tau filament from VT.

550

551 **Figure S2**

552 **Double-labelling immunofluorescence using anti-tau and anti-glia**  
553 **fibrillary acid protein antibodies.**

554 Sections of frontal cortex from the individual with mutation D395G in *VCP*  
555 were labelled with: a, anti-tau antibody AT8 (green) and anti-glia  
556 fibrillary acidic protein antibody (red); b, anti-tau antibody pS396 (red)  
557 and anti-glia fibrillary acidic protein antibody (green). DAPI nuclear  
558 staining is in blue. There was no evidence for the co-localisation of AT8,  
559 pS396 and glial fibrillary acidic protein. Scale bar, 50  $\mu\text{m}$ .

560

561

562

563

564

565

566
